# Supplementary material for: Enhancing Phosphorus and Nitrogen Uptake in Maize Crops with Food Industry Biosolids and Azotobacter nigricans
Source: MDPI journal article supplement (doi:10.3390/plants12173052), 2023-08-25
Supplement: s1 [file s1]

## Supplementary Figures

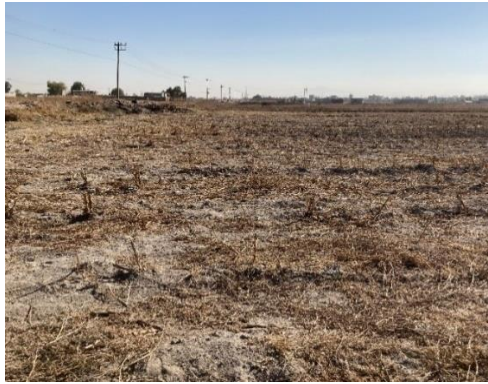

**Figure S1.** Parcel area of the Ex-Hacienda de Santa Inés, selected for the present study.

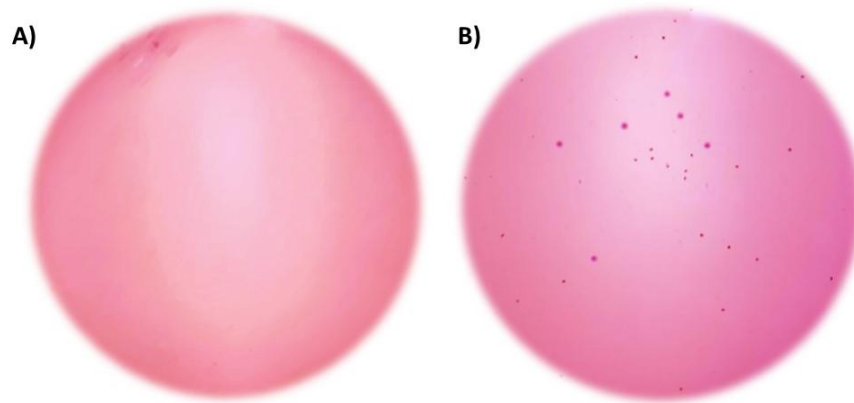

**Figure S2.** ABRV medium for count of total coliforms in biosolids a) Blank and b) Biological, dilution  $1 \times 10^{-3}$  CFU mL<sup>-1</sup>.

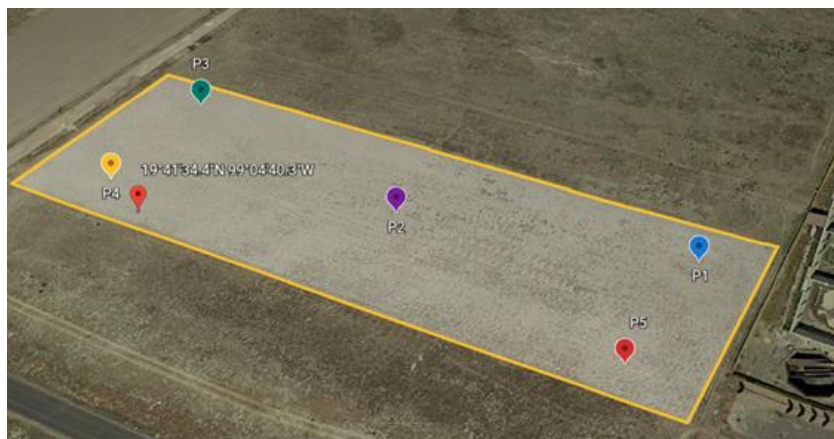

**Figure S3.** Plot of 500 m x 250 m in the Ex-Hacienda Santa Inés, Nextlalpan, Edo. Mex. (19°41'32.4"N 99°04'39.4"W), selected for agricultural soil sampling.

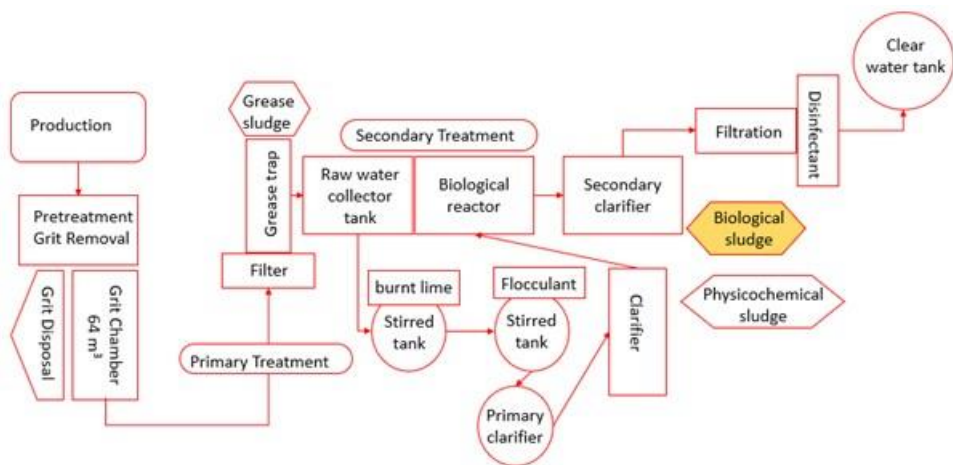

**Figure S4.** Wastewater treatment plant for the food industry of Grupo Herdez Mexico.

## Supplemenytary Tables

Table S1. Three-way MANOVA. *Zea mays* seedlings grown with soil, biosolid 25% (v/v) and Long Ashton, with and without *Azotobacter nigricans* ( $1 \times 10^8$  CFU mL<sup>-1</sup>).

| Contrastes multivariados <sup>d</sup> |                    |          |                        |                    |              |      |                         |                                       |                                 |
|---------------------------------------|--------------------|----------|------------------------|--------------------|--------------|------|-------------------------|---------------------------------------|---------------------------------|
| Efecto                                |                    | Valor    | F                      | Gl de la hipótesis | Gl del error | Sig. | Eta al cuadrado parcial | Parámetro de no centralidad Parámetro | Potencia observada <sup>b</sup> |
| Intersección                          | Traza de Pillai    | 1.000    | 30297.450 <sup>a</sup> | 4.000              | 21.000       | .000 | 1.000                   | 121189.801                            | 1.000                           |
|                                       | Lambda de Wilks    | .000     | 30297.450 <sup>a</sup> | 4.000              | 21.000       | .000 | 1.000                   | 121189.801                            | 1.000                           |
|                                       | Traza de Hotelling | 5770.943 | 30297.450 <sup>a</sup> | 4.000              | 21.000       | .000 | 1.000                   | 121189.801                            | 1.000                           |
|                                       | Raíz mayor de Roy  | 5770.943 | 30297.450 <sup>a</sup> | 4.000              | 21.000       | .000 | 1.000                   | 121189.801                            | 1.000                           |
| Time                                  | Traza de Pillai    | 1.984    | 672.031                | 8.000              | 44.000       | .000 | .992                    | 5376.248                              | 1.000                           |
|                                       | Lambda de Wilks    | .000     | 1316.319 <sup>a</sup>  | 8.000              | 42.000       | .000 | .996                    | 10530.552                             | 1.000                           |
|                                       | Traza de Hotelling | 1026.785 | 2566.962               | 8.000              | 40.000       | .000 | .998                    | 20535.698                             | 1.000                           |
|                                       | Raíz mayor de Roy  | 961.982  | 5290.903 <sup>c</sup>  | 4.000              | 22.000       | .000 | .999                    | 21163.612                             | 1.000                           |
| Solid_matrix                          | Traza de Pillai    | 2.579    | 35.240                 | 12.000             | 69.000       | .000 | .860                    | 422.878                               | 1.000                           |
|                                       | Lambda de Wilks    | .000     | 199.101                | 12.000             | 55.852       | .000 | .964                    | 1509.051                              | 1.000                           |
|                                       | Traza de Hotelling | 547.969  | 898.061                | 12.000             | 59.000       | .000 | .995                    | 10776.729                             | 1.000                           |
|                                       | Raíz mayor de Roy  | 532.702  | 3063.038 <sup>c</sup>  | 4.000              | 23.000       | .000 | .998                    | 12252.154                             | 1.000                           |
| Inoculum                              | Traza de Pillai    | .985     | 353.946 <sup>a</sup>   | 4.000              | 21.000       | .000 | .985                    | 1415.783                              | 1.000                           |
|                                       | Lambda de Wilks    | .015     | 353.946 <sup>a</sup>   | 4.000              | 21.000       | .000 | .985                    | 1415.783                              | 1.000                           |
|                                       | Traza de Hotelling | 67.418   | 353.946 <sup>a</sup>   | 4.000              | 21.000       | .000 | .985                    | 1415.783                              | 1.000                           |
|                                       | Raíz mayor de Roy  | 67.418   | 353.946 <sup>a</sup>   | 4.000              | 21.000       | .000 | .985                    | 1415.783                              | 1.000                           |
| Time * Solid_matrix                   | Traza de Pillai    | 2.956    | 11.329                 | 24.000             | 96.000       | .000 | .739                    | 271.895                               | 1.000                           |
|                                       | Lambda de Wilks    | .000     | 48.592                 | 24.000             | 74.470       | .000 | .914                    | 791.414                               | 1.000                           |
|                                       | Traza de Hotelling | 181.773  | 147.691                | 24.000             | 78.000       | .000 | .978                    | 3544.580                              | 1.000                           |
|                                       | Raíz mayor de Roy  | 159.720  | 638.880 <sup>c</sup>   | 6.000              | 24.000       | .000 | .994                    | 3833.278                              | 1.000                           |
| Time * Inoculum                       | Traza de Pillai    | 1.177    | 7.864                  | 8.000              | 44.000       | .000 | .588                    | 62.912                                | 1.000                           |
|                                       | Lambda de Wilks    | .034     | 23.354 <sup>a</sup>    | 8.000              | 42.000       | .000 | .816                    | 186.829                               | 1.000                           |
|                                       | Traza de Hotelling | 22.433   | 56.083                 | 8.000              | 40.000       | .000 | .918                    | 448.667                               | 1.000                           |
|                                       | Raíz mayor de Roy  | 22.151   | 121.831 <sup>c</sup>   | 4.000              | 22.000       | .000 | .957                    | 487.326                               | 1.000                           |
| Solid_matrix * Inoculum               | Traza de Pillai    | 1.945    | 10.594                 | 12.000             | 69.000       | .000 | .648                    | 127.125                               | 1.000                           |
|                                       | Lambda de Wilks    | .015     | 17.943                 | 12.000             | 55.852       | .000 | .752                    | 169.162                               | 1.000                           |
|                                       | Traza de Hotelling | 17.016   | 27.887                 | 12.000             | 59.000       | .000 | .850                    | 334.643                               | 1.000                           |
|                                       | Raíz mayor de Roy  | 14.944   | 85.931 <sup>c</sup>    | 4.000              | 23.000       | .000 | .937                    | 343.722                               | 1.000                           |
| Time * Solid_matrix * Inoculum        | Traza de Pillai    | 2.404    | 6.024                  | 24.000             | 96.000       | .000 | .601                    | 144.574                               | 1.000                           |
|                                       | Lambda de Wilks    | .003     | 13.929                 | 24.000             | 74.470       | .000 | .774                    | 254.328                               | 1.000                           |
|                                       | Traza de Hotelling | 30.511   | 24.790                 | 24.000             | 78.000       | .000 | .884                    | 594.961                               | 1.000                           |
|                                       | Raíz mayor de Roy  | 22.394   | 89.575 <sup>c</sup>    | 6.000              | 24.000       | .000 | .957                    | 537.448                               | 1.000                           |

a. Estadístico exacto

b. Calculado con alfa = .05

c. El estadístico es un límite superior para la F el cual ofrece un límite inferior para el nivel de significación.

d. Diseño: Intersección + Time + Solid\_matrix + Inoculum + Time \* Solid\_matrix + Time \* Inoculum + Solid\_matrix \* Inoculum + Time \* Solid\_matrix \* Inoculum

**Pruebas de los efectos inter-sujetos**

| Origen                         | Variable dependiente | Suma de cuadrados tipo III | gl | Media cuadrática | F         | Sig. | Eta al cuadrado parcial | Parámetro de no centralidad Parámetro | Potencia observada <sup>b</sup> |
|--------------------------------|----------------------|----------------------------|----|------------------|-----------|------|-------------------------|---------------------------------------|---------------------------------|
| Modelo corregido               | Stem tickness (cm)   | .232 <sup>a</sup>          | 23 | .010             | 39.389    | .000 | .974                    | 905.943                               | 1.000                           |
|                                | No. roots            | 174.979 <sup>c</sup>       | 23 | 7.608            | 8.115     | .000 | .886                    | 186.644                               | 1.000                           |
|                                | Plant length (cm)    | 5851.872 <sup>d</sup>      | 23 | 254.429          | 886.172   | .000 | .999                    | 20381.957                             | 1.000                           |
|                                | Root length (cm)     | 3167.150 <sup>e</sup>      | 23 | 137.702          | 987.998   | .000 | .999                    | 22723.945                             | 1.000                           |
| Intersección                   | Stem tickness (cm)   | 7.434                      | 1  | 7.434            | 29010.740 | .000 | .999                    | 29010.740                             | 1.000                           |
|                                | No. roots            | 2867.521                   | 1  | 2867.521         | 3058.689  | .000 | .992                    | 3058.689                              | 1.000                           |
|                                | Plant length (cm)    | 22691.778                  | 1  | 22691.778        | 79035.020 | .000 | 1.000                   | 79035.020                             | 1.000                           |
|                                | Root length (cm)     | 9371.635                   | 1  | 9371.635         | 67240.432 | .000 | 1.000                   | 67240.432                             | 1.000                           |
| Time                           | Stem tickness (cm)   | .121                       | 2  | .061             | 236.325   | .000 | .952                    | 472.650                               | 1.000                           |
|                                | No. roots            | 1.167                      | 2  | .583             | .622      | .545 | .049                    | 1.244                                 | .142                            |
|                                | Plant length (cm)    | 5525.718                   | 2  | 2762.859         | 9622.983  | .000 | .999                    | 19245.967                             | 1.000                           |
|                                | Root length (cm)     | 734.338                    | 2  | 367.169          | 2634.396  | .000 | .995                    | 5268.792                              | 1.000                           |
| Solid_matrix                   | Stem tickness (cm)   | .012                       | 3  | .004             | 15.098    | .000 | .654                    | 45.293                                | 1.000                           |
|                                | No. roots            | 3.562                      | 3  | 1.187            | 1.267     | .308 | .137                    | 3.800                                 | .295                            |
|                                | Plant length (cm)    | 78.362                     | 3  | 26.121           | 90.978    | .000 | .919                    | 272.935                               | 1.000                           |
|                                | Root length (cm)     | 1643.201                   | 3  | 547.734          | 3929.927  | .000 | .998                    | 11789.780                             | 1.000                           |
| Inoculum                       | Stem tickness (cm)   | .055                       | 1  | .055             | 216.008   | .000 | .900                    | 216.008                               | 1.000                           |
|                                | No. roots            | 99.187                     | 1  | 99.187           | 105.800   | .000 | .815                    | 105.800                               | 1.000                           |
|                                | Plant length (cm)    | 95.739                     | 1  | 95.739           | 333.458   | .000 | .933                    | 333.458                               | 1.000                           |
|                                | Root length (cm)     | 150.167                    | 1  | 150.167          | 1077.430  | .000 | .978                    | 1077.430                              | 1.000                           |
| Time * Solid_matrix            | Stem tickness (cm)   | .023                       | 6  | .004             | 14.797    | .000 | .787                    | 88.780                                | 1.000                           |
|                                | No. roots            | 30.500                     | 6  | 5.083            | 5.422     | .001 | .575                    | 32.533                                | .980                            |
|                                | Plant length (cm)    | 95.002                     | 6  | 15.834           | 55.149    | .000 | .932                    | 330.891                               | 1.000                           |
|                                | Root length (cm)     | 493.504                    | 6  | 82.251           | 590.139   | .000 | .993                    | 3540.834                              | 1.000                           |
| Time * Inoculum                | Stem tickness (cm)   | .012                       | 2  | .006             | 22.472    | .000 | .652                    | 44.943                                | 1.000                           |
|                                | No. roots            | 6.000                      | 2  | 3.000            | 3.200     | .059 | .211                    | 6.400                                 | .556                            |
|                                | Plant length (cm)    | .100                       | 2  | .050             | .174      | .841 | .014                    | .348                                  | .074                            |
|                                | Root length (cm)     | 48.604                     | 2  | 24.302           | 174.363   | .000 | .936                    | 348.726                               | 1.000                           |
| Solid_matrix * Inoculum        | Stem tickness (cm)   | .005                       | 3  | .002             | 6.967     | .002 | .466                    | 20.902                                | .956                            |
|                                | No. roots            | 6.562                      | 3  | 2.187            | 2.333     | .099 | .226                    | 7.000                                 | .515                            |
|                                | Plant length (cm)    | 14.669                     | 3  | 4.890            | 17.031    | .000 | .680                    | 51.093                                | 1.000                           |
|                                | Root length (cm)     | 30.949                     | 3  | 10.316           | 74.018    | .000 | .902                    | 222.055                               | 1.000                           |
| Time * Solid_matrix * Inoculum | Stem tickness (cm)   | .004                       | 6  | .001             | 2.894     | .029 | .420                    | 17.366                                | .796                            |
|                                | No. roots            | 28.000                     | 6  | 4.667            | 4.978     | .002 | .554                    | 29.867                                | .969                            |
|                                | Plant length (cm)    | 42.281                     | 6  | 7.047            | 24.544    | .000 | .860                    | 147.265                               | 1.000                           |
|                                | Root length (cm)     | 66.388                     | 6  | 11.065           | 79.388    | .000 | .952                    | 476.326                               | 1.000                           |
| Error                          | Stem tickness (cm)   | .006                       | 24 | .000             |           |      |                         |                                       |                                 |
|                                | No. roots            | 22.500                     | 24 | .938             |           |      |                         |                                       |                                 |
|                                | Plant length (cm)    | 6.891                      | 24 | .287             |           |      |                         |                                       |                                 |
|                                | Root length (cm)     | 3.345                      | 24 | .139             |           |      |                         |                                       |                                 |
| Total                          | Stem tickness (cm)   | 7.672                      | 48 |                  |           |      |                         |                                       |                                 |
|                                | No. roots            | 3065.000                   | 48 |                  |           |      |                         |                                       |                                 |
|                                | Plant length (cm)    | 28550.540                  | 48 |                  |           |      |                         |                                       |                                 |
|                                | Root length (cm)     | 12542.130                  | 48 |                  |           |      |                         |                                       |                                 |
| Total corregida                | Stem tickness (cm)   | .238                       | 47 |                  |           |      |                         |                                       |                                 |
|                                | No. roots            | 197.479                    | 47 |                  |           |      |                         |                                       |                                 |
|                                | Plant length (cm)    | 5858.763                   | 47 |                  |           |      |                         |                                       |                                 |
|                                | Root length (cm)     | 3170.495                   | 47 |                  |           |      |                         |                                       |                                 |

a. R cuadrado = .974 (R cuadrado corregida = .949)

b. Calculado con alfa = .05

c. R cuadrado = .886 (R cuadrado corregida = .777)

d. R cuadrado = .999 (R cuadrado corregida = .998)

e. R cuadrado = .999 (R cuadrado corregida = .998)

Table S2. Three-way MANOVA. Multivariate contrasts. *Zea mays* seedlings grown with soil, biosolid 25 (v/v) and Long Ashton, with and without *Azotobacter nigricans* ( $1 \times 10^8$  CFU mL<sup>-1</sup>).

| Contrastes multivariados <sup>c</sup> |                    |          |                        |                    |              |      |
|---------------------------------------|--------------------|----------|------------------------|--------------------|--------------|------|
| Efecto                                |                    | Valor    | F                      | Gl de la hipótesis | Gl del error | Sig. |
| Intersección                          | Traza de Pillai    | 1.000    | 30297.450 <sup>a</sup> | 4.000              | 21.000       | .000 |
|                                       | Lambda de Wilks    | .000     | 30297.450 <sup>a</sup> | 4.000              | 21.000       | .000 |
|                                       | Traza de Hotelling | 5770.943 | 30297.450 <sup>a</sup> | 4.000              | 21.000       | .000 |
|                                       | Raíz mayor de Roy  | 5770.943 | 30297.450 <sup>a</sup> | 4.000              | 21.000       | .000 |
| Time                                  | Traza de Pillai    | 1.984    | 672.031                | 8.000              | 44.000       | .000 |
|                                       | Lambda de Wilks    | .000     | 1316.319 <sup>a</sup>  | 8.000              | 42.000       | .000 |
|                                       | Traza de Hotelling | 1026.785 | 2566.962               | 8.000              | 40.000       | .000 |
|                                       | Raíz mayor de Roy  | 961.982  | 5290.903 <sup>b</sup>  | 4.000              | 22.000       | .000 |
| Solid_matrix                          | Traza de Pillai    | 2.579    | 35.240                 | 12.000             | 69.000       | .000 |
|                                       | Lambda de Wilks    | .000     | 199.101                | 12.000             | 55.852       | .000 |
|                                       | Traza de Hotelling | 547.969  | 898.061                | 12.000             | 59.000       | .000 |
|                                       | Raíz mayor de Roy  | 532.702  | 3063.038 <sup>b</sup>  | 4.000              | 23.000       | .000 |
| inoculum                              | Traza de Pillai    | .985     | 353.946 <sup>a</sup>   | 4.000              | 21.000       | .000 |
|                                       | Lambda de Wilks    | .015     | 353.946 <sup>a</sup>   | 4.000              | 21.000       | .000 |
|                                       | Traza de Hotelling | 67.418   | 353.946 <sup>a</sup>   | 4.000              | 21.000       | .000 |
|                                       | Raíz mayor de Roy  | 67.418   | 353.946 <sup>a</sup>   | 4.000              | 21.000       | .000 |
| Time * Solid_matrix                   | Traza de Pillai    | 2.956    | 11.329                 | 24.000             | 96.000       | .000 |
|                                       | Lambda de Wilks    | .000     | 48.592                 | 24.000             | 74.470       | .000 |
|                                       | Traza de Hotelling | 181.773  | 147.691                | 24.000             | 78.000       | .000 |
|                                       | Raíz mayor de Roy  | 159.720  | 638.880 <sup>b</sup>   | 6.000              | 24.000       | .000 |
| Time * inoculum                       | Traza de Pillai    | 1.177    | 7.864                  | 8.000              | 44.000       | .000 |
|                                       | Lambda de Wilks    | .034     | 23.354 <sup>a</sup>    | 8.000              | 42.000       | .000 |
|                                       | Traza de Hotelling | 22.433   | 56.083                 | 8.000              | 40.000       | .000 |
|                                       | Raíz mayor de Roy  | 22.151   | 121.831 <sup>b</sup>   | 4.000              | 22.000       | .000 |
| Solid_matrix * inoculum               | Traza de Pillai    | 1.945    | 10.594                 | 12.000             | 69.000       | .000 |
|                                       | Lambda de Wilks    | .015     | 17.943                 | 12.000             | 55.852       | .000 |
|                                       | Traza de Hotelling | 17.016   | 27.887                 | 12.000             | 59.000       | .000 |
|                                       | Raíz mayor de Roy  | 14.944   | 85.931 <sup>b</sup>    | 4.000              | 23.000       | .000 |
| Time * Solid_matrix * inoculum        | Traza de Pillai    | 2.404    | 6.024                  | 24.000             | 96.000       | .000 |
|                                       | Lambda de Wilks    | .003     | 13.929                 | 24.000             | 74.470       | .000 |
|                                       | Traza de Hotelling | 30.511   | 24.790                 | 24.000             | 78.000       | .000 |
|                                       | Raíz mayor de Roy  | 22.394   | 89.575 <sup>b</sup>    | 6.000              | 24.000       | .000 |

a. Estadístico exacto

b. El estadístico es un límite superior para la F el cual ofrece un límite inferior para el nivel de significación.

c. Diseño: Intersección + Time + Solid\_matrix + inoculum + Time \* Solid\_matrix + Time \* inoculum + Solid\_matrix \* inoculum + Time \* Solid\_matrix \* inoculum

Table S3. Three-way MANOVA. Comparison of means.

| Comparaciones múltiples |              |                 |                 |                            |            |       |                            |                 |
|-------------------------|--------------|-----------------|-----------------|----------------------------|------------|-------|----------------------------|-----------------|
| Variable dependiente    |              | (I)Solid matrix | (J)Solid matrix | Diferencia de medias (I-J) | Error típ. | Sig.  | Intervalo de confianza 95% |                 |
|                         |              |                 |                 |                            |            |       | Límite inferior            | Límite superior |
| Stem thickness (cm)     | DHS de Tukey | 0.25Bios        | Biosolid        | .0417*                     | .00654     | .000  | .0236                      | .0597           |
|                         |              |                 | LA              | .0317*                     | .00654     | .000  | .0136                      | .0497           |
|                         |              |                 | Soil            | .0192*                     | .00654     | .034  | .0011                      | .0372           |
|                         |              | Biosolid        | 0.25Bios        | -.0417*                    | .00654     | .000  | -.0597                     | -.0236          |
|                         |              |                 | LA              | -.0100                     | .00654     | .436  | -.0280                     | .0080           |
|                         |              |                 | Soil            | -.0225*                    | .00654     | .011  | -.0405                     | -.0045          |
|                         |              | LA              | 0.25Bios        | -.0317*                    | .00654     | .000  | -.0497                     | -.0136          |
|                         |              |                 | Biosolid        | .0100                      | .00654     | .436  | -.0080                     | .0280           |
|                         |              |                 | Soil            | -.0125                     | .00654     | .249  | -.0305                     | .0055           |
|                         |              | Soil            | 0.25Bios        | -.0192*                    | .00654     | .034  | -.0372                     | -.0011          |
|                         |              |                 | Biosolid        | .0225*                     | .00654     | .011  | .0045                      | .0405           |
|                         |              |                 | LA              | .0125                      | .00654     | .249  | -.0055                     | .0305           |
|                         | Bonferroni   | 0.25Bios        | Biosolid        | .0417*                     | .00654     | .000  | .0229                      | .0605           |
|                         |              |                 | LA              | .0317*                     | .00654     | .000  | .0129                      | .0505           |
|                         |              |                 | Soil            | .0192*                     | .00654     | .044  | .0004                      | .0380           |
|                         |              | Biosolid        | 0.25Bios        | -.0417*                    | .00654     | .000  | -.0605                     | -.0229          |
|                         |              |                 | LA              | -.0100                     | .00654     | .834  | -.0288                     | .0088           |
|                         |              |                 | Soil            | -.0225*                    | .00654     | .013  | -.0413                     | -.0037          |
|                         |              | LA              | 0.25Bios        | -.0317*                    | .00654     | .000  | -.0505                     | -.0129          |
|                         |              |                 | Biosolid        | .0100                      | .00654     | .834  | -.0088                     | .0288           |
|                         |              |                 | Soil            | -.0125                     | .00654     | .407  | -.0313                     | .0063           |
|                         |              | Soil            | 0.25Bios        | -.0192*                    | .00654     | .044  | -.0380                     | -.0004          |
|                         |              |                 | Biosolid        | .0225*                     | .00654     | .013  | .0037                      | .0413           |
|                         |              |                 | LA              | .0125                      | .00654     | .407  | -.0063                     | .0313           |
| Root number             | DHS de Tukey | 0.25Bios        | Biosolid        | .50                        | .395       | .593  | -.59                       | 1.59            |
|                         |              |                 | LA              | .50                        | .395       | .593  | -.59                       | 1.59            |
|                         |              |                 | Soil            | .75                        | .395       | .256  | -.34                       | 1.84            |
|                         |              | Biosolid        | 0.25Bios        | -.50                       | .395       | .593  | -1.59                      | .59             |
|                         |              |                 | LA              | .00                        | .395       | 1.000 | -1.09                      | 1.09            |
|                         |              |                 | Soil            | .25                        | .395       | .921  | -.84                       | 1.34            |
|                         |              | LA              | 0.25Bios        | -.50                       | .395       | .593  | -1.59                      | .59             |
|                         |              |                 | Biosolid        | .00                        | .395       | 1.000 | -1.09                      | 1.09            |
|                         |              |                 | Soil            | .25                        | .395       | .921  | -.84                       | 1.34            |
|                         |              | Soil            | 0.25Bios        | -.75                       | .395       | .256  | -1.84                      | .34             |
|                         |              |                 | Biosolid        | -.25                       | .395       | .921  | -1.34                      | .84             |
|                         |              |                 | LA              | -.25                       | .395       | .921  | -1.34                      | .84             |
|                         | Bonferroni   | 0.25Bios        | Biosolid        | .50                        | .395       | 1.000 | -.64                       | 1.64            |
|                         |              |                 | LA              | .50                        | .395       | 1.000 | -.64                       | 1.64            |
|                         |              |                 | Soil            | .75                        | .395       | .419  | -.39                       | 1.89            |
|                         |              | Biosolid        | 0.25Bios        | -.50                       | .395       | 1.000 | -1.64                      | .64             |
|                         |              |                 | LA              | .00                        | .395       | 1.000 | -1.14                      | 1.14            |
|                         |              |                 | Soil            | .25                        | .395       | 1.000 | -.89                       | 1.39            |
|                         |              | LA              | 0.25Bios        | -.50                       | .395       | 1.000 | -1.64                      | .64             |
|                         |              |                 | Biosolid        | .00                        | .395       | 1.000 | -1.14                      | 1.14            |
|                         |              |                 | Soil            | .25                        | .395       | 1.000 | -.89                       | 1.39            |
|                         |              | Soil            | 0.25Bios        | -.75                       | .395       | .419  | -1.89                      | .39             |
|                         |              |                 | Biosolid        | -.25                       | .395       | 1.000 | -1.39                      | .89             |
|                         |              |                 | LA              | -.25                       | .395       | 1.000 | -1.39                      | .89             |
| Plant length (cm)       | DHS de Tukey | 0.25Bios        | Biosolid        | 1.8392*                    | .21875     | .000  | 1.2357                     | 2.4426          |
|                         |              |                 | LA              | -1.4083*                   | .21875     | .000  | -2.0118                    | -.8049          |
|                         |              |                 | Soil            | -1.1350*                   | .21875     | .000  | -1.7384                    | -.5316          |

|  |  |              |          |          |           |        |       |          |          |
|--|--|--------------|----------|----------|-----------|--------|-------|----------|----------|
|  |  | Bonferroni   | Biosolid | 0.25Bios | -1.8392*  | .21875 | .000  | -2.4426  | -1.2357  |
|  |  |              | LA       |          | -3.2475*  | .21875 | .000  | -3.8509  | -2.6441  |
|  |  |              | Soil     |          | -2.9742*  | .21875 | .000  | -3.5776  | -2.3707  |
|  |  |              | LA       | 0.25Bios | 1.4083*   | .21875 | .000  | .8049    | 2.0118   |
|  |  |              | Biosolid |          | 3.2475*   | .21875 | .000  | 2.6441   | 3.8509   |
|  |  |              | Soil     |          | .2733     | .21875 | .603  | -.3301   | .8768    |
|  |  |              | Soil     | 0.25Bios | 1.1350*   | .21875 | .000  | .5316    | 1.7384   |
|  |  |              | Biosolid |          | 2.9742*   | .21875 | .000  | 2.3707   | 3.5776   |
|  |  |              | LA       |          | -.2733    | .21875 | .603  | -.8768   | .3301    |
|  |  | Bonferroni   | 0.25Bios | Biosolid | 1.8392*   | .21875 | .000  | 1.2102   | 2.4681   |
|  |  |              |          | LA       | -1.4083*  | .21875 | .000  | -2.0373  | -.7794   |
|  |  |              |          | Soil     | -1.1350*  | .21875 | .000  | -1.7639  | -.5061   |
|  |  |              | Biosolid | 0.25Bios | -1.8392*  | .21875 | .000  | -2.4681  | -1.2102  |
|  |  |              |          | LA       | -3.2475*  | .21875 | .000  | -3.8764  | -2.6186  |
|  |  |              |          | Soil     | -2.9742*  | .21875 | .000  | -3.6031  | -2.3452  |
|  |  |              | LA       | 0.25Bios | 1.4083*   | .21875 | .000  | .7794    | 2.0373   |
|  |  |              |          | Biosolid | 3.2475*   | .21875 | .000  | 2.6186   | 3.8764   |
|  |  |              |          | Soil     | .2733     | .21875 | 1.000 | -.3556   | .9023    |
|  |  | DHS de Tukey | Soil     | 0.25Bios | 1.1350*   | .21875 | .000  | .5061    | 1.7639   |
|  |  |              |          | Biosolid | 2.9742*   | .21875 | .000  | 2.3452   | 3.6031   |
|  |  |              |          | LA       | -.2733    | .21875 | 1.000 | -.9023   | .3556    |
|  |  |              | 0.25Bios | Biosolid | 2.9083*   | .15241 | .000  | 2.4879   | 3.3288   |
|  |  |              |          | LA       | 5.5250*   | .15241 | .000  | 5.1046   | 5.9454   |
|  |  |              |          | Soil     | -9.9250*  | .15241 | .000  | -10.3454 | -9.5046  |
|  |  |              | Biosolid | 0.25Bios | -2.9083*  | .15241 | .000  | -3.3288  | -2.4879  |
|  |  |              |          | LA       | 2.6167*   | .15241 | .000  | 2.1962   | 3.0371   |
|  |  |              |          | Soil     | -12.8333* | .15241 | .000  | -13.2538 | -12.4129 |
|  |  | DHS de Tukey | LA       | 0.25Bios | -5.5250*  | .15241 | .000  | -5.9454  | -5.1046  |
|  |  |              |          | Biosolid | -2.6167*  | .15241 | .000  | -3.0371  | -2.1962  |
|  |  |              |          | Soil     | -15.4500* | .15241 | .000  | -15.8704 | -15.0296 |
|  |  |              | Soil     | 0.25Bios | 9.9250*   | .15241 | .000  | 9.5046   | 10.3454  |
|  |  |              |          | Biosolid | 12.8333*  | .15241 | .000  | 12.4129  | 13.2538  |
|  |  |              |          | LA       | 15.4500*  | .15241 | .000  | 15.0296  | 15.8704  |
|  |  | Bonferroni   | 0.25Bios | Biosolid | 2.9083*   | .15241 | .000  | 2.4701   | 3.3465   |
|  |  |              |          | LA       | 5.5250*   | .15241 | .000  | 5.0868   | 5.9632   |
|  |  |              |          | Soil     | -9.9250*  | .15241 | .000  | -10.3632 | -9.4868  |
|  |  |              | Biosolid | 0.25Bios | -2.9083*  | .15241 | .000  | -3.3465  | -2.4701  |
|  |  |              |          | LA       | 2.6167*   | .15241 | .000  | 2.1785   | 3.0549   |
|  |  |              |          | Soil     | -12.8333* | .15241 | .000  | -13.2715 | -12.3951 |
|  |  |              | LA       | 0.25Bios | -5.5250*  | .15241 | .000  | -5.9632  | -5.0868  |
|  |  |              |          | Biosolid | -2.6167*  | .15241 | .000  | -3.0549  | -2.1785  |
|  |  |              |          | Soil     | -15.4500* | .15241 | .000  | -15.8882 | -15.0118 |
|  |  | DHS de Tukey | Soil     | 0.25Bios | 9.9250*   | .15241 | .000  | 9.4868   | 10.3632  |
|  |  |              |          | Biosolid | 12.8333*  | .15241 | .000  | 12.3951  | 13.2715  |
|  |  |              |          | LA       | 15.4500*  | .15241 | .000  | 15.0118  | 15.8882  |

Basadas en las medias observadas.

El término de error es la media cuadrática(Error) = .139.

\*. La diferencia de medias es significativa al nivel .05.
